# Supplementary material
Source: PubMed Central journal article supplement (PMC8974333)
Supplement: gbab144_suppl_supplementary_materials.pdf [file gbab144_suppl_supplementary_materials.pdf]

Appendix 1. Results of General Linear Models Examining the Independent Associations of Activity Diversity with Emodiversity Beyond Each Activity Time in MIDUS II

|                                                    | Positive Emodiversity |             |                 |                       |              | Negative Emodiversity |             |                 |                       |              |
|----------------------------------------------------|-----------------------|-------------|-----------------|-----------------------|--------------|-----------------------|-------------|-----------------|-----------------------|--------------|
|                                                    | <i>B</i>              | <i>SE</i>   | p-value         | 95% CI                | $\beta$      | <i>B</i>              | <i>SE</i>   | p-value         | 95% CI                | $\beta$      |
| Intercept                                          | 96.00                 | 0.47        | <.001           | [95.09, 96.92]        | 0.00         | 19.38                 | 0.82        | <.001           | [17.78, 20.98]        | 0.00         |
| <b>Activity diversity</b>                          | <b>0.05</b>           | <b>0.01</b> | <b>&lt;.001</b> | <b>[0.03, 0.07]</b>   | <b>0.10</b>  | <b>0.07</b>           | <b>0.02</b> | <b>&lt;.001</b> | <b>[0.03, 0.11]</b>   | <b>0.05</b>  |
| Time at work                                       | 0.05                  | 0.05        | 0.305           | [-0.05, 0.16]         | 0.02         | <b>0.24</b>           | <b>0.09</b> | <b>0.010</b>    | <b>[0.06, 0.42]</b>   | <b>0.04</b>  |
| Time with children                                 | 0.09                  | 0.06        | 0.142           | [-0.03, 0.22]         | 0.03         | <b>0.26</b>           | <b>0.11</b> | <b>0.020</b>    | <b>[0.04, 0.48]</b>   | <b>0.03</b>  |
| Time in doing chores                               | 0.16                  | 0.12        | 0.189           | [-0.08, 0.4]          | 0.02         | <b>0.51</b>           | <b>0.22</b> | <b>0.018</b>    | <b>[0.09, 0.93]</b>   | <b>0.03</b>  |
| Time in leisure                                    | -0.04                 | 0.07        | 0.603           | [-0.18, 0.11]         | -0.01        | -0.04                 | 0.13        | 0.786           | [-0.29, 0.22]         | 0.00         |
| Time in physical activities                        | <b>-0.36</b>          | <b>0.14</b> | <b>0.008</b>    | <b>[-0.63, -0.09]</b> | <b>-0.05</b> | <b>-0.85</b>          | <b>0.24</b> | <b>0.000</b>    | <b>[-1.31, -0.38]</b> | <b>-0.04</b> |
| Time in volunteering                               | <b>-0.24</b>          | <b>0.09</b> | <b>0.009</b>    | <b>[-0.42, -0.06]</b> | <b>-0.05</b> | -0.20                 | 0.16        | 0.217           | [-0.51, 0.12]         | -0.01        |
| Time in giving help                                | <b>-0.19</b>          | <b>0.06</b> | <b>0.001</b>    | <b>[-0.3, -0.08]</b>  | <b>-0.06</b> | -0.08                 | 0.10        | 0.420           | [-0.28, 0.12]         | -0.01        |
| Mean positive or negative emotions                 | <b>7.18</b>           | <b>0.19</b> | <b>&lt;.001</b> | <b>[6.82, 7.55]</b>   | <b>0.67</b>  | <b>63.74</b>          | <b>0.86</b> | <b>&lt;.001</b> | <b>[62.04, 65.43]</b> | <b>0.88</b>  |
| Total # of days with positive or negative emotions | 0.03                  | 0.09        | 0.711           | [-0.15, 0.21]         | 0.01         | <b>1.39</b>           | <b>0.18</b> | <b>&lt;.001</b> | <b>[1.04, 1.74]</b>   | <b>0.09</b>  |
| Miwaukee (vs. not)                                 | <b>-1.20</b>          | <b>0.60</b> | <b>0.046</b>    | <b>[-2.37, -0.02]</b> | <b>-0.04</b> | <b>-2.84</b>          | <b>1.06</b> | <b>0.007</b>    | <b>[-4.92, -0.77]</b> | <b>-0.04</b> |
| Age                                                | 0.02                  | 0.01        | 0.231           | [-0.01, 0.04]         | 0.03         | -0.03                 | 0.02        | 0.186           | [-0.07, 0.01]         | -0.02        |
| Male (vs. female)                                  | 0.34                  | 0.27        | 0.208           | [-0.19, 0.87]         | 0.02         | 0.49                  | 0.47        | 0.301           | [-0.44, 1.42]         | 0.01         |
| White (vs. non-White)                              | -0.70                 | 0.47        | 0.136           | [-1.62, 0.22]         | -0.03        | 0.98                  | 0.82        | 0.236           | [-0.64, 2.59]         | 0.02         |
| Education                                          | -0.02                 | 0.05        | 0.743           | [-0.12, 0.09]         | -0.01        | <b>0.25</b>           | <b>0.09</b> | <b>0.007</b>    | <b>[0.07, 0.43]</b>   | <b>0.03</b>  |
| Physical health                                    | <b>0.50</b>           | <b>0.14</b> | <b>&lt;.001</b> | <b>[0.24, 0.77]</b>   | <b>0.07</b>  | <b>-0.83</b>          | <b>0.23</b> | <b>&lt;.001</b> | <b>[-1.29, -0.37]</b> | <b>-0.04</b> |
| <i>Fit Statistics</i>                              |                       |             |                 |                       |              |                       |             |                 |                       |              |
| <i>F</i> test                                      | 120.07                |             | <.001           |                       |              | 401.78                |             | <.001           |                       |              |

Note. *N* = 2,012; 2,007 observations were used due to missing values in covariates. The main variable of interest is grey highlighted. Significant associations (at *p* < .05) are bolded.

Appendix 2. Results of General Linear Models Examining the Independent Associations of Activity Diversity with Emodiversity Beyond Each Activity Time in MIDUS Refresher

|                                                    | Positive Emodiversity |             |                 |                       |              | Negative Emodiversity |             |                 |                       |              |
|----------------------------------------------------|-----------------------|-------------|-----------------|-----------------------|--------------|-----------------------|-------------|-----------------|-----------------------|--------------|
|                                                    | <i>B</i>              | <i>SE</i>   | p-value         | 95% CI                | $\beta$      | <i>B</i>              | <i>SE</i>   | p-value         | 95% CI                | $\beta$      |
| Intercept                                          | 94.87                 | 0.53        | <.001           | [93.82, 95.92]        | 0.00         | 19.73                 | 1.06        | <.001           | [17.65, 21.81]        | 0.00         |
| <b>Activity diversity</b>                          | <b>0.06</b>           | <b>0.02</b> | <b>0.004</b>    | <b>[0.02, 0.1]</b>    | <b>0.10</b>  | <b>0.12</b>           | <b>0.04</b> | <b>0.004</b>    | <b>[0.04, 0.2]</b>    | <b>0.07</b>  |
| Time at work                                       | 0.02                  | 0.09        | 0.859           | [-0.15, 0.18]         | 0.01         | 0.19                  | 0.17        | 0.250           | [-0.14, 0.53]         | 0.03         |
| Time with children                                 | <b>-0.26</b>          | <b>0.10</b> | <b>0.008</b>    | <b>[-0.44, -0.07]</b> | <b>-0.08</b> | 0.14                  | 0.19        | 0.465           | [-0.23, 0.51]         | 0.02         |
| Time in doing chores                               | -0.03                 | 0.22        | 0.907           | [-0.45, 0.4]          | 0.00         | 0.22                  | 0.43        | 0.612           | [-0.63, 1.06]         | 0.01         |
| Time in leisure                                    | <b>-0.30</b>          | <b>0.11</b> | <b>0.005</b>    | <b>[-0.52, -0.09]</b> | <b>-0.08</b> | 0.08                  | 0.22        | 0.726           | [-0.35, 0.5]          | 0.01         |
| Time in physical activities                        | <b>-0.46</b>          | <b>0.19</b> | <b>0.014</b>    | <b>[-0.83, -0.09]</b> | <b>-0.06</b> | -0.23                 | 0.37        | 0.537           | [-0.95, 0.5]          | -0.01        |
| Time in volunteering                               | -0.11                 | 0.15        | 0.462           | [-0.42, 0.19]         | -0.02        | -0.02                 | 0.31        | 0.959           | [-0.62, 0.59]         | 0.00         |
| Time in giving help                                | 0.13                  | 0.11        | 0.250           | [-0.09, 0.35]         | 0.03         | 0.12                  | 0.23        | 0.588           | [-0.32, 0.57]         | 0.01         |
| Mean positive or negative emotions                 | <b>7.74</b>           | <b>0.28</b> | <b>&lt;.001</b> | <b>[7.19, 8.29]</b>   | <b>0.72</b>  | <b>61.63</b>          | <b>1.40</b> | <b>&lt;.001</b> | <b>[58.88, 64.37]</b> | <b>0.84</b>  |
| Total # of days with positive or negative emotions | -0.16                 | 0.13        | 0.210           | [-0.41, 0.09]         | -0.03        | 0.20                  | 0.27        | 0.463           | [-0.33, 0.72]         | 0.01         |
| Age                                                | -0.03                 | 0.02        | 0.115           | [-0.07, 0.01]         | -0.05        | <b>-0.10</b>          | <b>0.04</b> | <b>0.008</b>    | <b>[-0.18, -0.03]</b> | <b>-0.06</b> |
| Male (vs. female)                                  | 0.81                  | 0.42        | 0.055           | [-0.02, 1.65]         | 0.05         | -0.47                 | 0.84        | 0.573           | [-2.12, 1.18]         | -0.01        |
| White (vs. non-White)                              | 0.72                  | 0.55        | 0.190           | [-0.36, 1.81]         | 0.03         | 1.62                  | 1.10        | 0.140           | [-0.53, 3.77]         | 0.03         |
| Education                                          | 0.17                  | 0.09        | 0.060           | [-0.01, 0.34]         | 0.05         | <b>0.59</b>           | <b>0.18</b> | <b>&lt;.001</b> | <b>[0.24, 0.93]</b>   | <b>0.07</b>  |
| Physical health                                    | 0.36                  | 0.20        | 0.081           | [-0.04, 0.76]         | 0.05         | -0.67                 | 0.40        | 0.094           | [-1.45, 0.11]         | -0.03        |
| <i>Fit Statistics</i>                              |                       |             |                 |                       |              |                       |             |                 |                       |              |
| <i>F</i> test                                      | 62.61                 |             | <.001           |                       |              | 149.18                |             | <.001           |                       |              |

Note. *N* = 779; 775 observations were used due to missing values in covariates. The main variable of interest is grey highlighted. Significant associations (at *p* < .05) are bolded.

Appendix 3. Results of General Linear Models Examining the Associations of Activity Diversity with Emodiversity Across Different Emodiversity Metrics in MIDUS II and Refresher

|                                         | Activity Diversity → Positive Emodiversity |             |                 |                      |             | Activity Diversity → Negative Emodiversity |             |                 |                     |             |
|-----------------------------------------|--------------------------------------------|-------------|-----------------|----------------------|-------------|--------------------------------------------|-------------|-----------------|---------------------|-------------|
|                                         | <i>B</i>                                   | <i>SE</i>   | p-value         | 95% CI               | $\beta$     | <i>B</i>                                   | <i>SE</i>   | p-value         | 95% CI              | $\beta$     |
| <b>MIDUS II (<i>n</i> = 2,012)</b>      |                                            |             |                 |                      |             |                                            |             |                 |                     |             |
| Shannon's entropy                       | <b>0.05</b>                                | <b>0.01</b> | <b>&lt;.001</b> | <b>[0.03, 0.07]</b>  | <b>0.09</b> | <b>0.07</b>                                | <b>0.02</b> | <b>&lt;.001</b> | <b>[0.03, 0.10]</b> | <b>0.05</b> |
| Gini coefficient                        | <b>0.06</b>                                | <b>0.01</b> | <b>&lt;.001</b> | <b>[0.04, 0.09]</b>  | <b>0.07</b> | <b>0.05</b>                                | <b>0.01</b> | <b>&lt;.001</b> | <b>[0.03, 0.07]</b> | <b>0.06</b> |
| Simpson coefficient                     | <b>0.03</b>                                | <b>0.01</b> | <b>&lt;.001</b> | <b>[0.01, 0.04]</b>  | <b>0.09</b> | <b>0.09</b>                                | <b>0.03</b> | <b>&lt;.001</b> | <b>[0.04, 0.15]</b> | <b>0.06</b> |
| <b>MIDUS Refresher (<i>n</i> = 779)</b> |                                            |             |                 |                      |             |                                            |             |                 |                     |             |
| Shannon's entropy                       | <b>0.08</b>                                | <b>0.02</b> | <b>&lt;.001</b> | <b>[0.04, 0.12]</b>  | <b>0.13</b> | <b>0.12</b>                                | <b>0.04</b> | <b>.001</b>     | <b>[0.05, 0.19]</b> | <b>0.07</b> |
| Gini coefficient                        | <b>0.10</b>                                | <b>0.02</b> | <b>&lt;.001</b> | <b>[0.05, 0.14]</b>  | <b>0.10</b> | <b>0.07</b>                                | <b>0.02</b> | <b>&lt;.001</b> | <b>[0.03, 0.10]</b> | <b>0.06</b> |
| Simpson coefficient                     | <b>0.03</b>                                | <b>0.01</b> | <b>.043</b>     | <b>[0.001, 0.05]</b> | <b>0.07</b> | <b>0.17</b>                                | <b>0.06</b> | <b>.002</b>     | <b>[0.06, 0.28]</b> | <b>0.08</b> |

*Note.* *n* = 2,007, 775 were used in the models for MIDUS II and MIDUS Refresher, respectively, due to missing values in covariates. Significant associations (at *p* < .05) are bolded. Models adjusted for all covariates.
